# Supplementary material for: Effect of Ethylene on Cell Wall and Lipid Metabolism during Alleviation of Postharvest Chilling Injury in Peach
Source: PubMed Central journal article supplement (PMC6952997; doi:10.3390/cells8121612), 2019-12-11
Supplement: cells-08-01612-s001.pdf [file cells-08-01612-s001.pdf]

**(a)**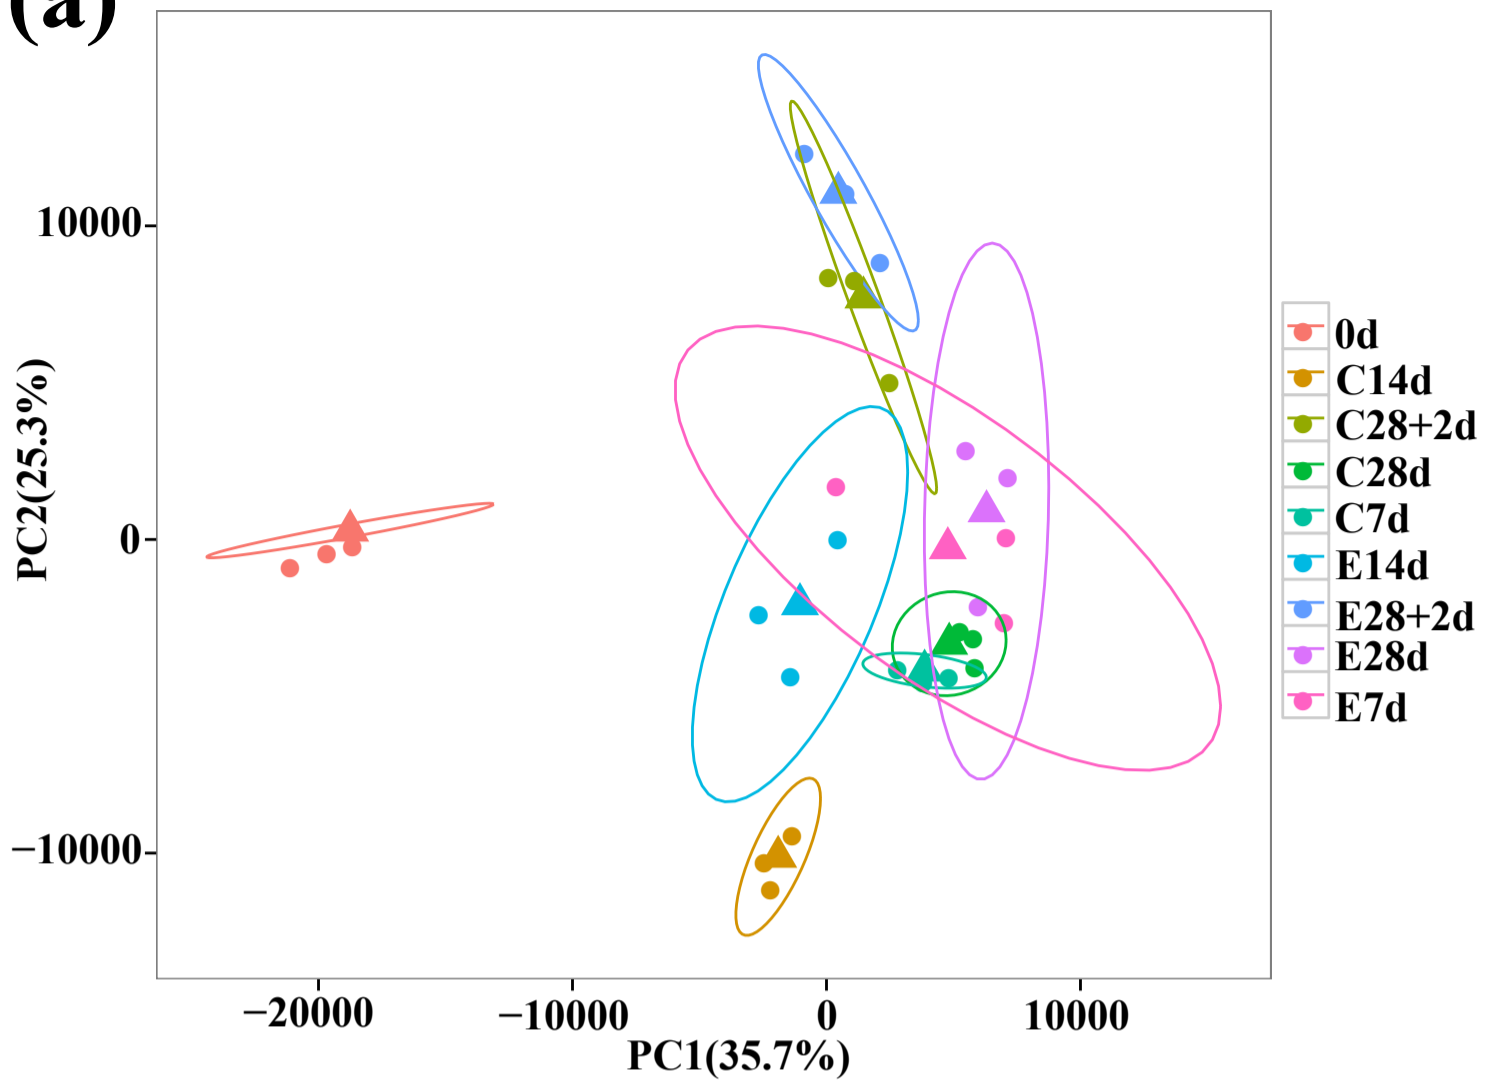**(b)**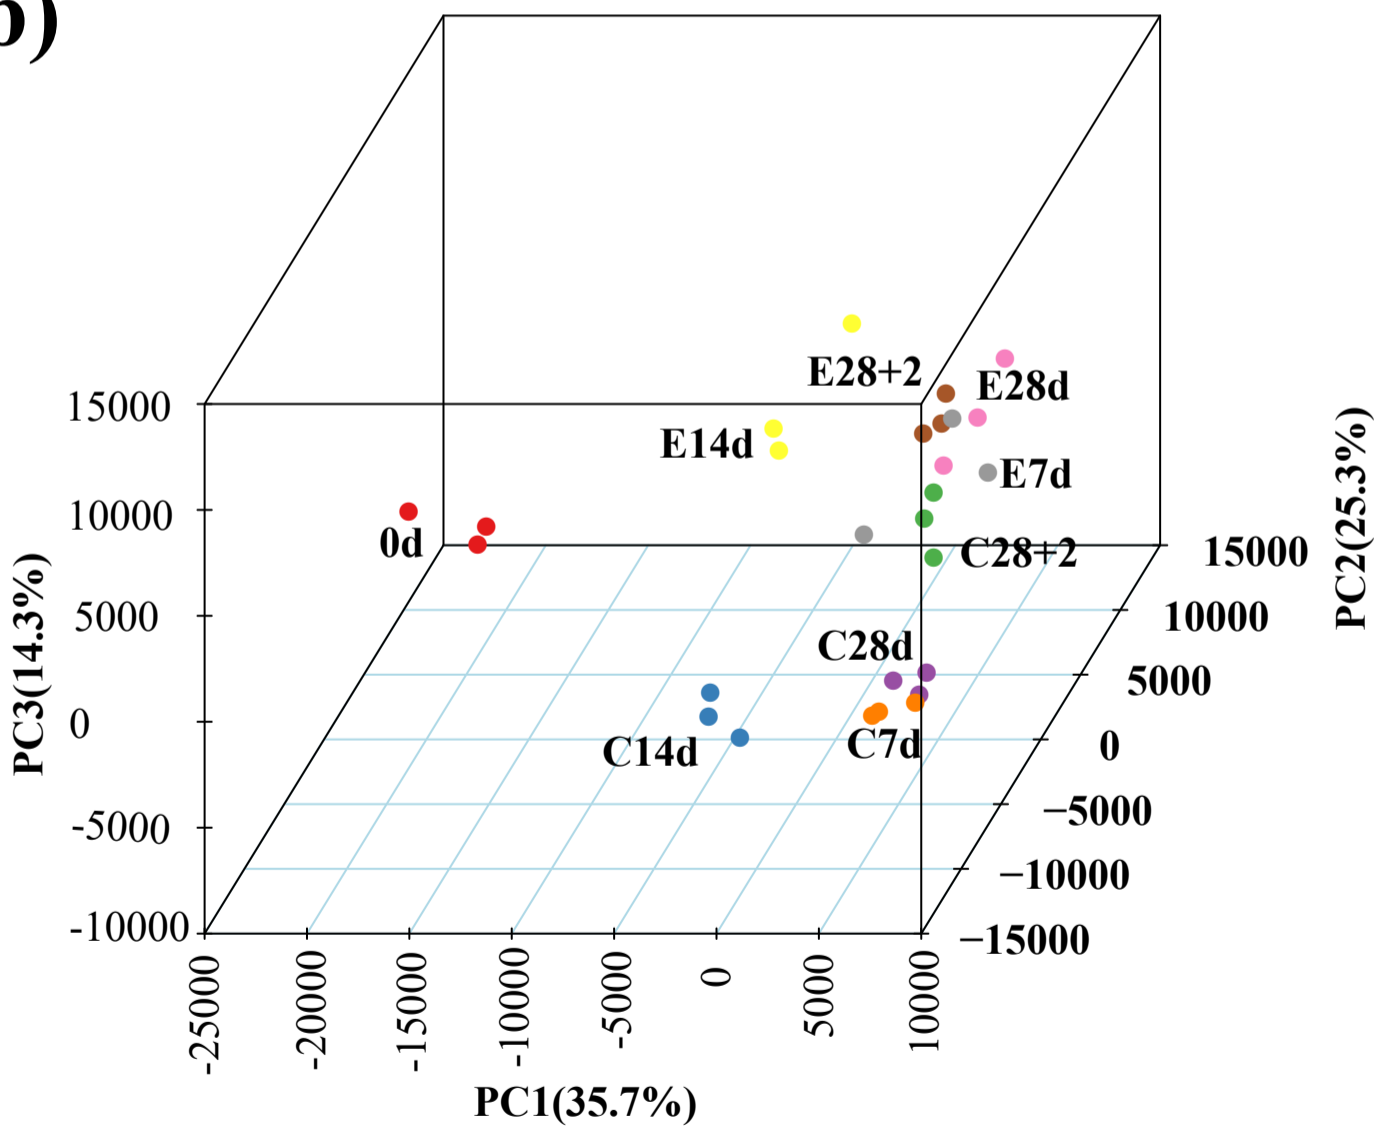

**Figure S1.** Principal component analysis (PCA) of fruit at harvest, after cold storage and subsequent ripening on shelf (+2 d) on the basis of transcriptome data. (a) PC1 vs PC2; (b) PC1 vs PC2 vs PC3. Three replicates per sample were analyzed. The percentage in the axis was explained by each PC. 0d, harvest point; 28+2 d, subsequent ripening for 2 d after 28 d of cold storage. PC, principal component. The sampling points beginning with letter C or E indicate those belonging to control and ethylene treatments, respectively.

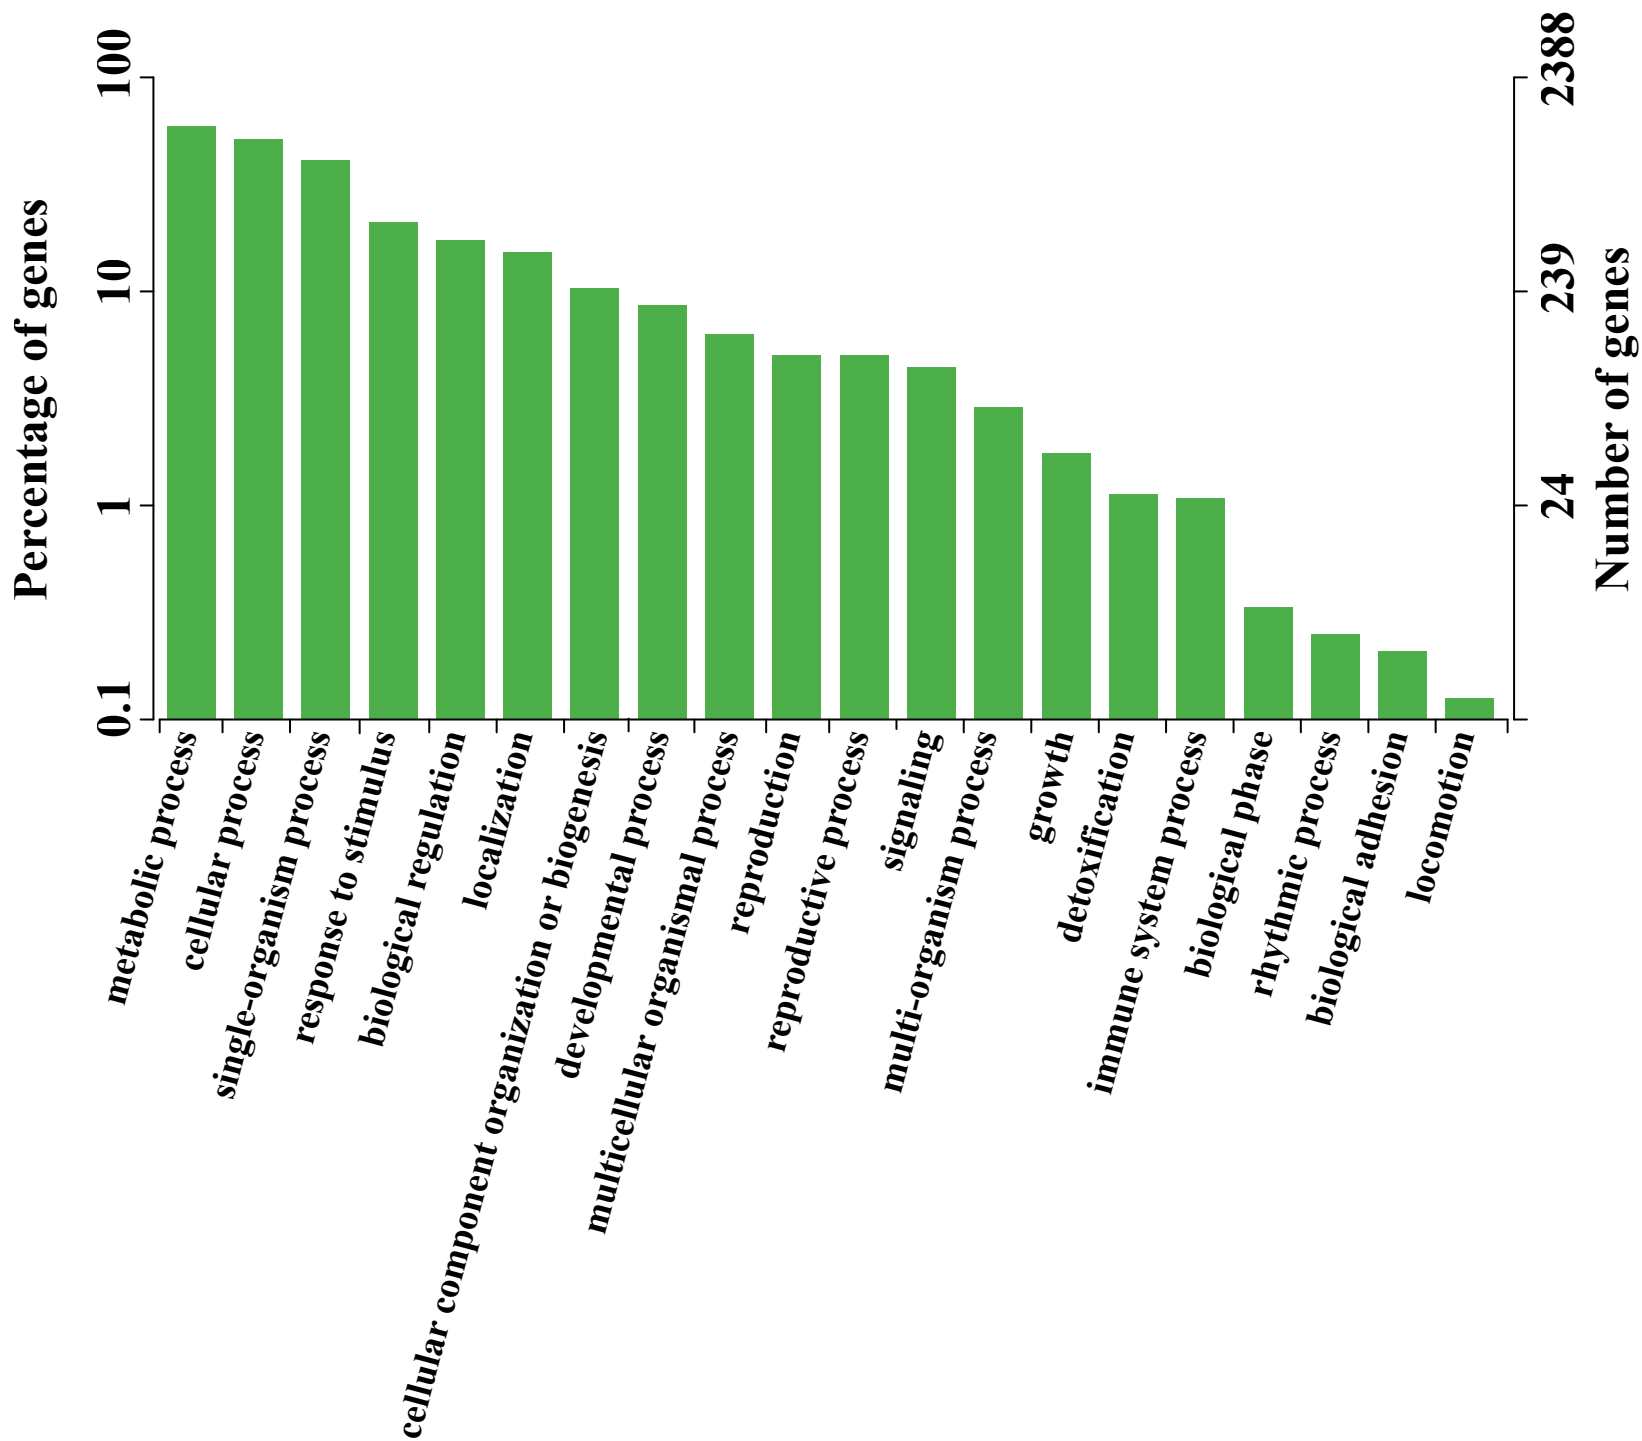

Figure S2. Gene Ontology (GO) analysis of differentially expressed genes (DEGS).

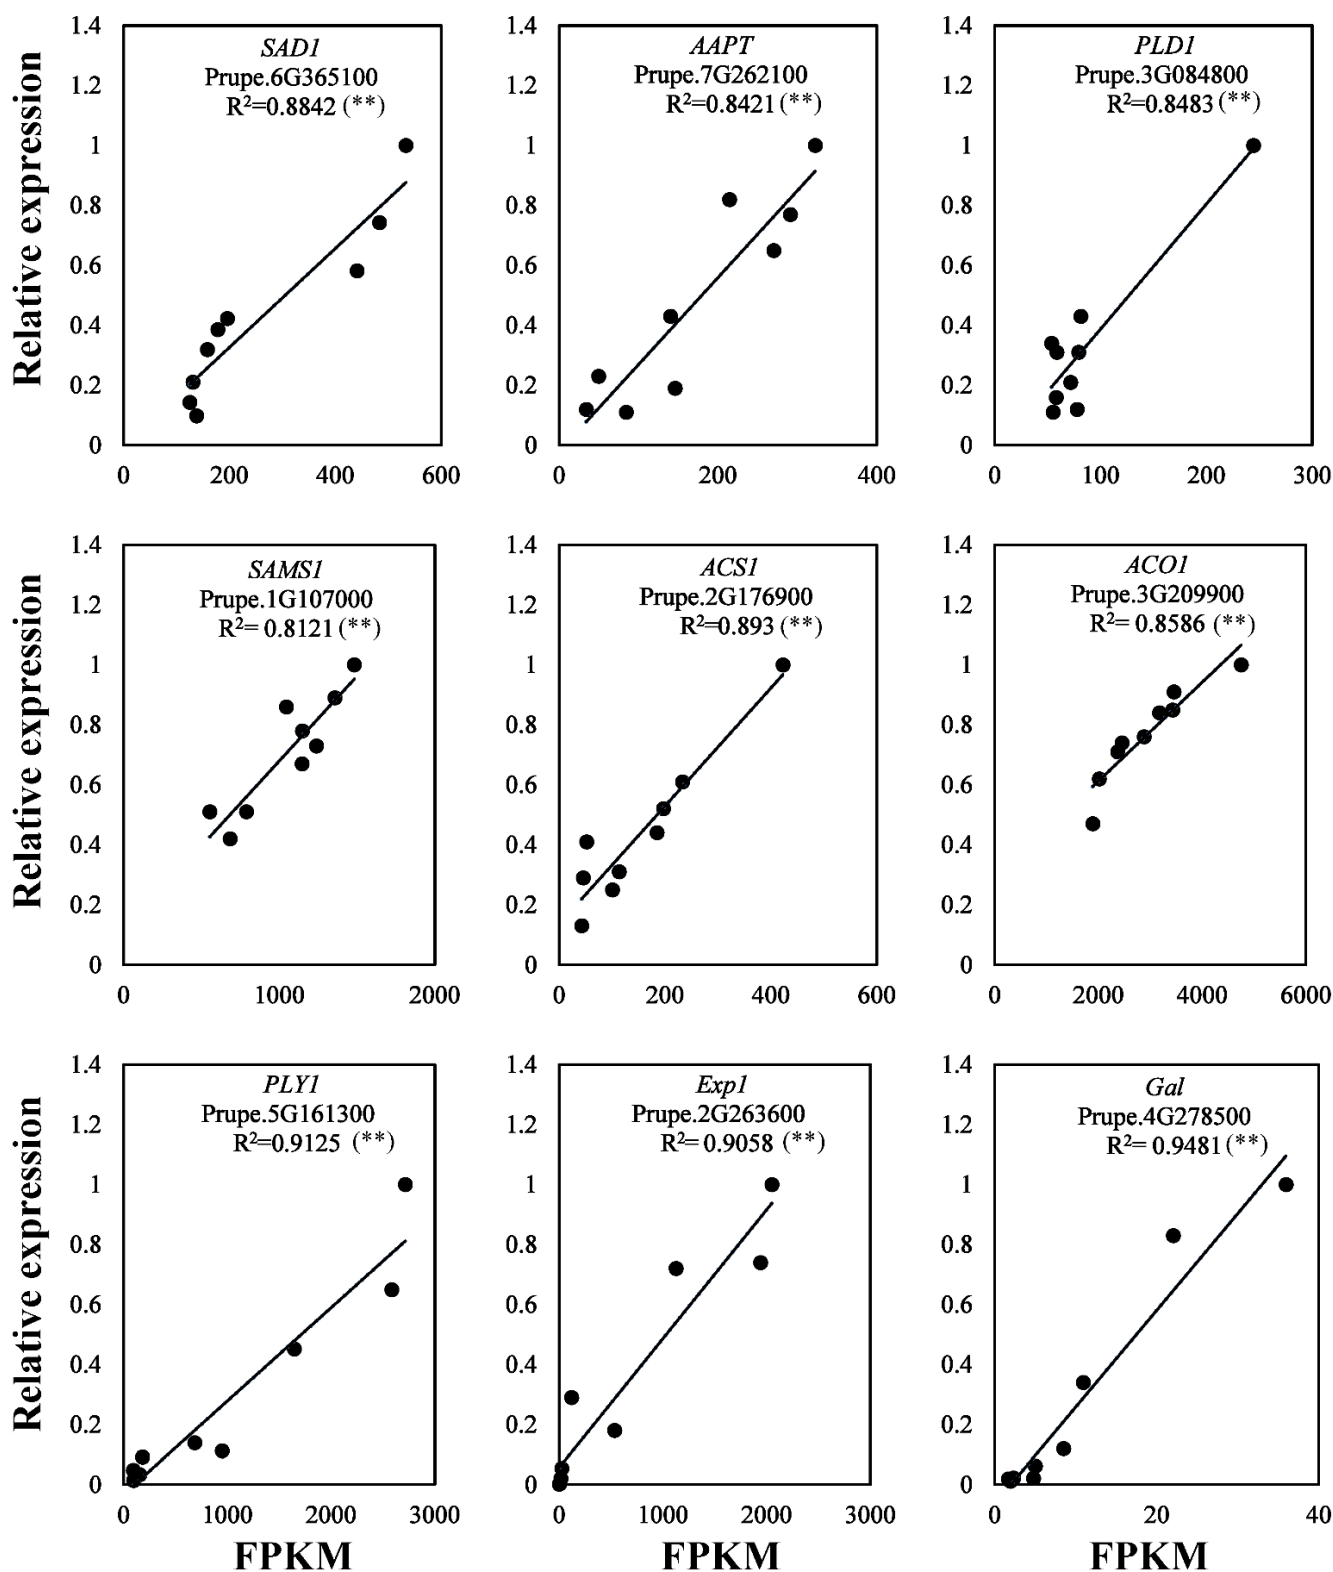

**Figure S3.** The correlation analysis between the relative expression data from real time quantitative PCR and FPKM in RNA-Seq results in control and ethylene-treated fruit. The genes were chosen representing lipids metabolism, ethylene synthesis metabolism and cell wall metabolism. Line represents the orthogonal fit to the data and correlation (R) is shown. FPKM, reads per kilobase per million mapped reads. Abbreviations used are as follows: SAD, stearyl-ACP desaturase; AAPT, aminoalcoholphosphotransferases; PLD, phospholipase D; SAMS, S-adenosylmethionine synthase; ACS, ACC synthase; ACO, 1-aminocyclopropane-1-carboxylic acid (ACC) oxidase; PLY, pectate lyase; Exp, expansin; Gal, galactosidase. Asterisk indicates a significantly correlation between relative expression level and FPKM ( $P < 0.01$ ) according to F-test.

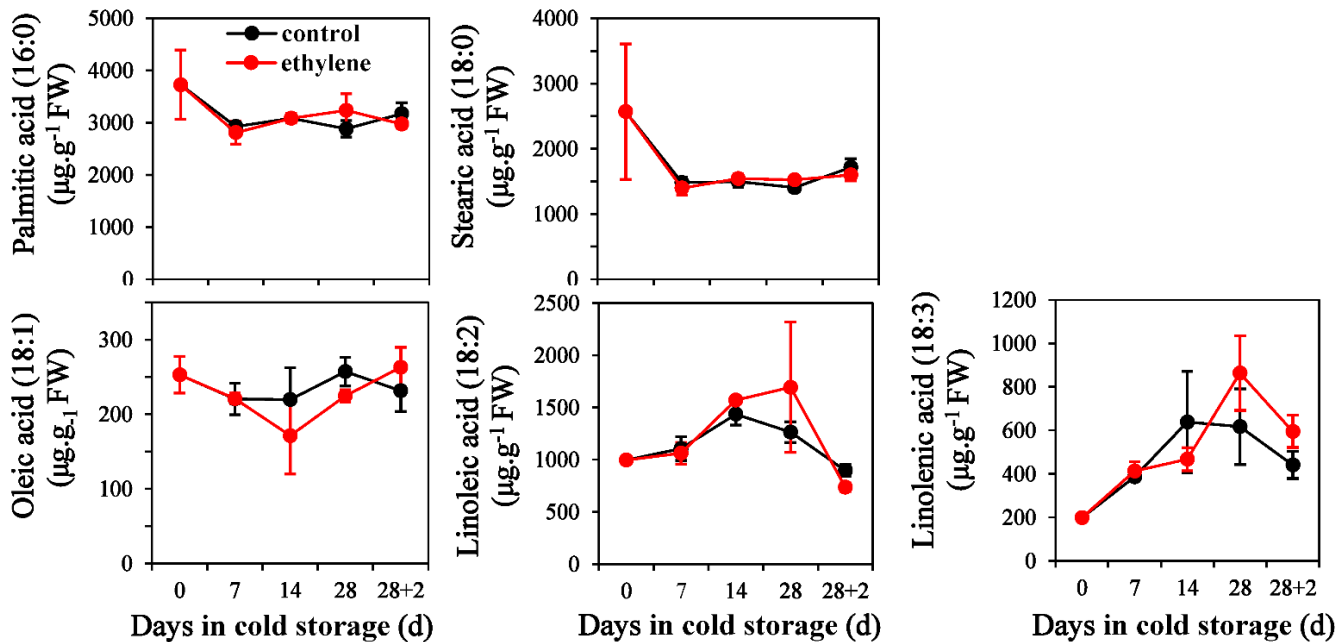

**Figure S4.** The effect of ethylene on fatty acid levels in peach fruit. Data are presented as mean  $\pm$  SE from three independent biological replicates.

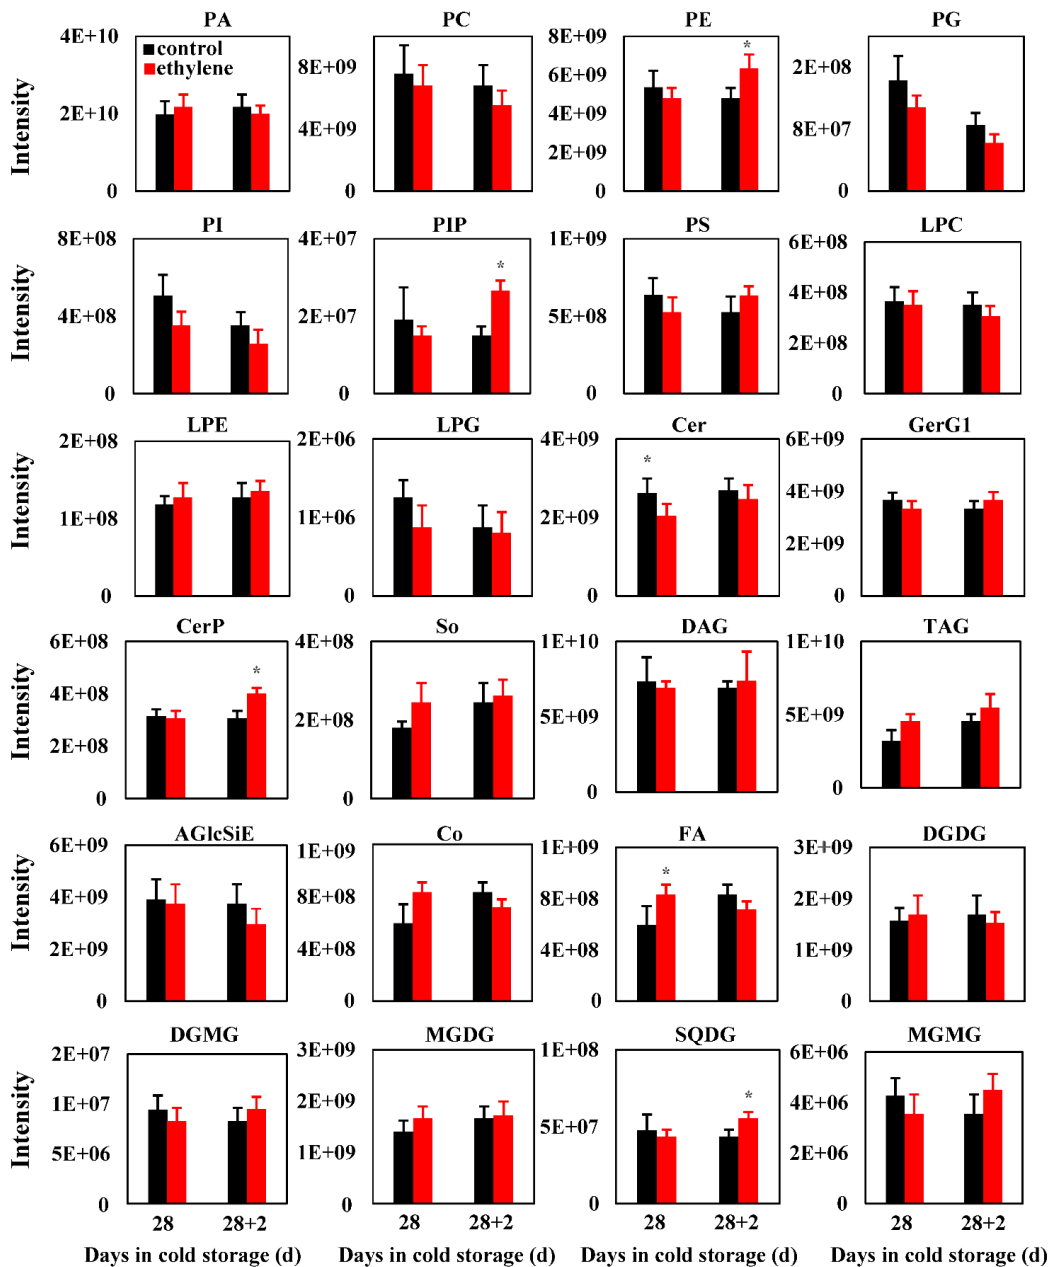

**Figure S5.** Total content of lipids in control and ethylene-treated fruit at 28 d of cold storage and +2 d of shelf. Data are presented as mean  $\pm$ SE from four independent biological replicates. Asterisks indicate that mean values are significantly different between the treatments of ethylene and control ( $P < 0.05$ ) according to Duncan's Multiple Range Test. AGlcSiE, AcylGlcSitosterol ester; Cer, ceramide; CerG1, monoglycosylceramide; CerP, ceramides phosphate; Co, coenzyme; DAG, diacylglyceride; DGDG, digalactosyldiacylglycerol; DGMG, digalactosylmonoacylglycerol; FA, fatty acid; LPC, lysophosphatidylcholine; LPE, lysophosphatidylethanolamine; LPG, lysophosphatidylglycerol; MGDG, monogalactosyldiacylglycerol; MGMG, monogalactosylmonoacylglycerol; PA, phosphatidic acid; PC, phosphatidylcholine; PE, phosphatidylethanolamine; PG, phosphatidylglycerol; PI, phosphatidylinositol; PIP, phosphatidylinositol; PS, phosphatidylserine; So, sphingosine; SQDG, sulfoquinovosyldiacylglycerol; TAG, triacylglyceride.

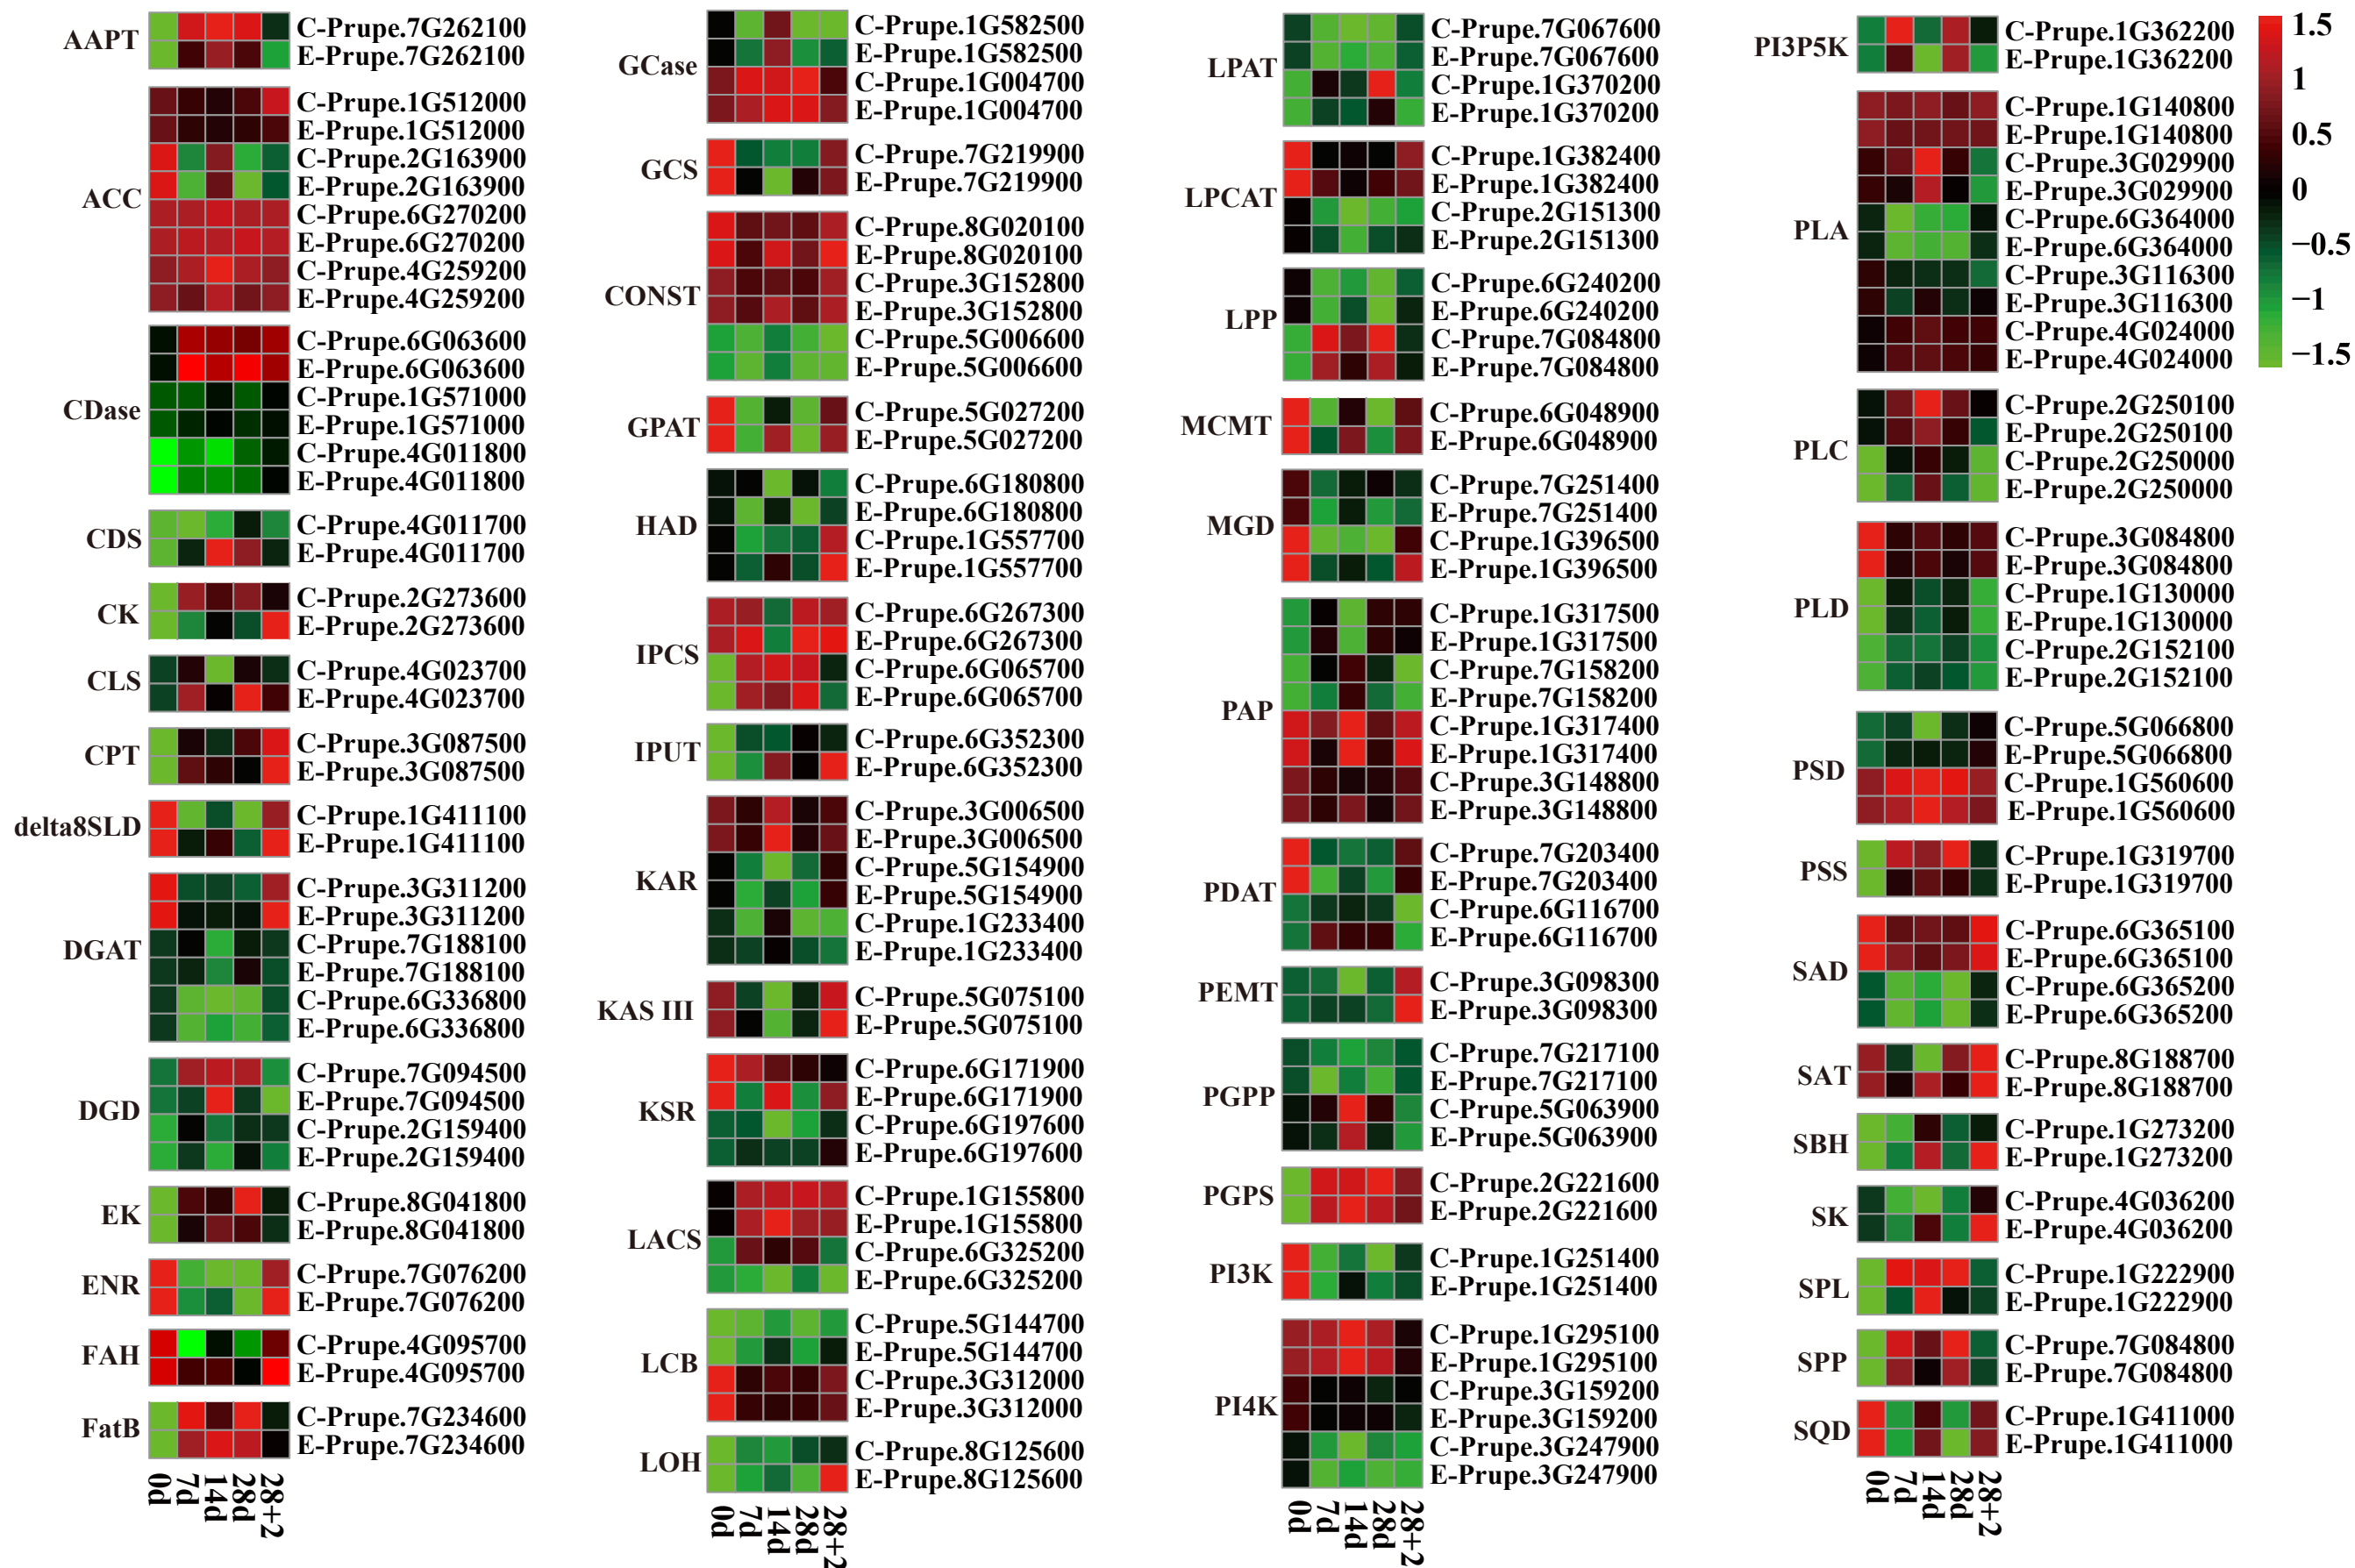

**Figure S6.** Expression profiling of genes related to lipid metabolism under ethylene treatment and the control. The color gradient, ranging from green, through black, to red represents low, middle and high values of gene expression. The sampling points beginning with letter C or E indicate those belong to control and ethylene treatments, respectively. The abbreviations are defined in the legend to Fig. 8.

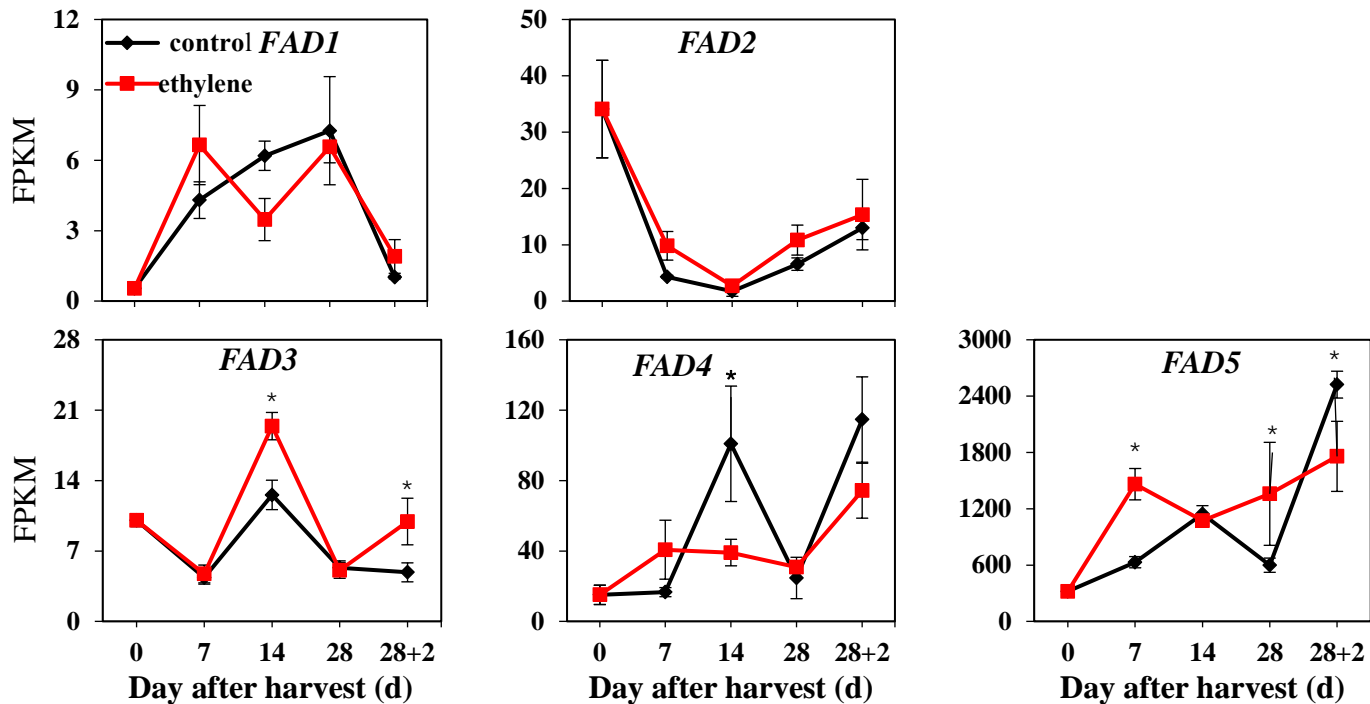

**Figure S7.** The effect of ethylene on expression of *FADs* in peach fruit. Data are presented as mean  $\pm$ SE from three independent biological replicates. Asterisks indicate that mean values are significantly different between the treatments of ethylene and control ( $P < 0.05$ ) according to Duncan's Multiple Range Test. FAD, fatty acid desaturase; FPKM, fragments per kilobase of exon per million reads mapped.

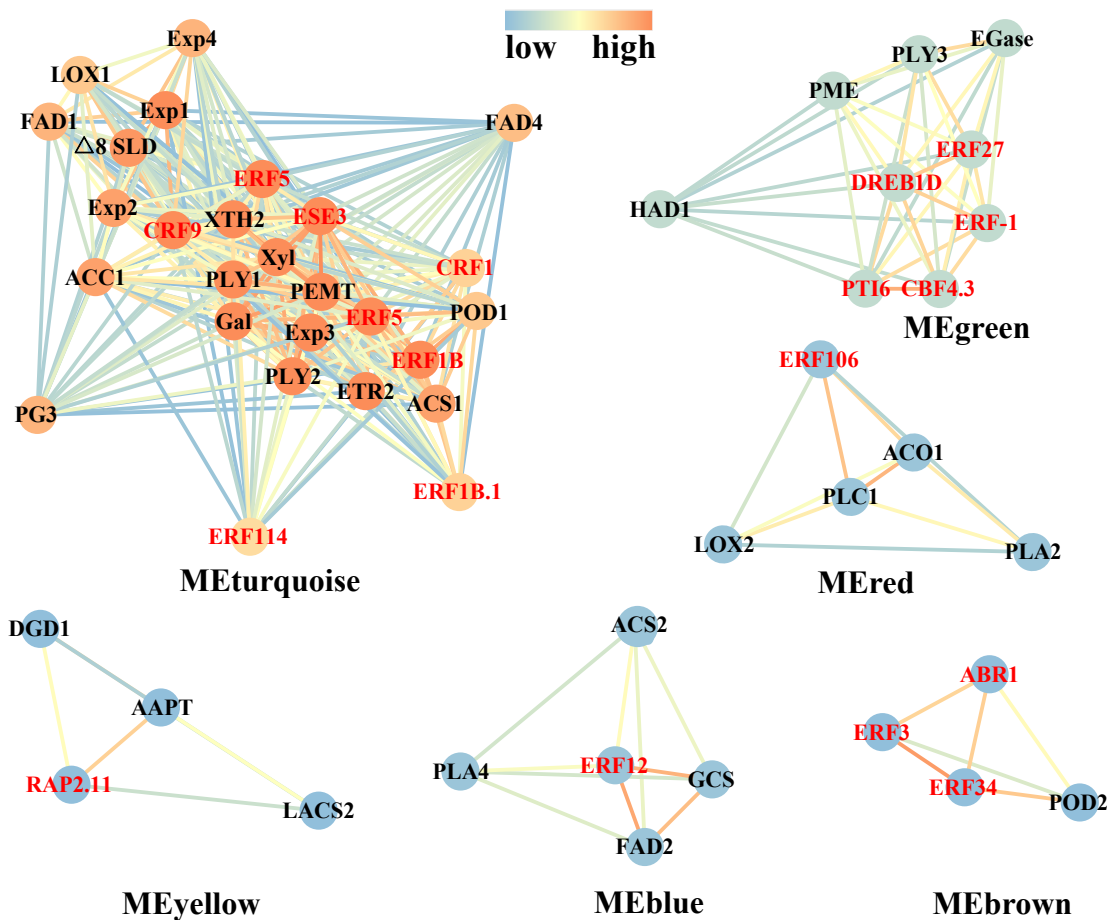

**Figure S8.** Coexpression network between *ERFs* and genes related to cell wall modification, lipid metabolism, ethylene biosynthesis and internal browning. The circle colour gradient from blue to yellow, indicates increase of degree of node size. The line colour gradient from blue to yellow, indicates increase of weight value of edge size. Genes in red indicate *ERFs*. The abbreviations are defined in the Figures 5, 8 and 10.





**Table S1.** Primers for real-time quantitative PCR.

| <b>Gene</b>                                                  | <b>Gene ID</b> | <b>Forward primer (5' to 3')</b> | <b>Reverse primer (5' to 3')</b> |
|--------------------------------------------------------------|----------------|----------------------------------|----------------------------------|
| <i>l-Aminocyclopropane-1-carboxylic acid oxidase (ACO1)</i>  | Prupe.3G209900 | TCAATGATATGGACTGGGAAAG           | GGTTGGGACAAGGAGGGT               |
| <i>l-Aminocyclopropane-1-carboxylic acid synthase (ACSI)</i> | Prupe.2G176900 | AGAAAGGCTGTGGCTATG               | ATCCCAAGTCTCGGTA AAA             |
| <i>Aminoalcoholphosphotransferases (AAPT)</i>                | Prupe.7G262100 | AAGCAAGCAAGACGGACAA              | GCCCATTAACGGCAGGAA               |
| <i>Expansin (Exp1)</i>                                       | Prupe.2G263600 | ACTATGGAGGAGGATGGG               | AAGAGTGACCGTTGATGG               |
| <i>Galactosidase (Gal)</i>                                   | Prupe.4G278500 | TAGGACTTTACAAGGGAGA              | TTCAAGGTCAATAGAGGG               |
| <i>Pectate lyase (PLY1)</i>                                  | Prupe.5G161300 | AAAGCCAGGGACTCTACGA              | TATGCCCAAGCAACATCA               |
| <i>Phospholipase D (PLD1)</i>                                | Prupe.3G084800 | AACCCACGATGAAGAAAC               | AGACCACCAACGAAACTC               |
| <i>S-adenosylmethionine synthase (SAMSI)</i>                 | Prupe.1G107000 | AGGAGATTGGTGCTGGTG               | ATGGGTTGAGATGGAAGATG             |
| <i>Stearoyl-ACP desaturase (SADI)</i>                        | Prupe.6G365100 | TCCCATCTCACAACTCC                | TGCCAGCACTTCTCAACA               |
| <i>PpTEF</i>                                                 | JQ732180       | GGTGTGACGATGAAGAGTGATG           | TGAAGGAGAGGGAAGGTGAAAG           |

**Table S2.** Quality of reads for 27 RNA-Seq samples. Abbreviations used are as follow: E, ethylene; C, control.

| <b>Sample name</b> | <b>Clean reads</b> | <b>clean bases</b> | <b>Q30 (%)</b> | <b>GC content (%)</b> |
|--------------------|--------------------|--------------------|----------------|-----------------------|
| 0d_1               | 32,314,227         | 9,605,293,878      | 95.47%         | 46.10%                |
| 0d_2               | 24,165,520         | 7,181,259,090      | 95.96%         | 46.74%                |
| 0d_3               | 27,738,993         | 8,252,424,248      | 95.95%         | 46.47%                |
| C7d_1              | 23,152,690         | 6,888,068,990      | 94.86%         | 46.74%                |
| C7d_2              | 25,945,786         | 7,709,988,648      | 94.71%         | 46.60%                |
| C7d_3              | 24,007,991         | 7,150,722,178      | 95.03%         | 46.86%                |
| E7d_1              | 23,290,138         | 6,939,570,860      | 95.29%         | 46.55%                |
| E7d_2              | 23,718,859         | 7,062,373,082      | 95.32%         | 47.41%                |
| E7d_3              | 20,603,107         | 6,152,345,128      | 94.85%         | 46.24%                |
| C14d_1             | 23,435,513         | 7,005,230,142      | 94.74%         | 45.99%                |
| C14d_2             | 25,179,000         | 7,531,611,508      | 94.54%         | 45.90%                |
| C14d_3             | 29,847,211         | 8,923,515,962      | 94.64%         | 45.85%                |
| E14d_1             | 30,047,416         | 8,995,751,812      | 94.65%         | 45.78%                |
| E14d_2             | 28,540,133         | 8,542,975,198      | 94.58%         | 45.78%                |
| E14d_3             | 27,219,109         | 8,148,753,194      | 94.39%         | 45.78%                |
| C28d_1             | 27,500,891         | 8,228,453,284      | 94.43%         | 46.27%                |
| C28d_2             | 29,388,660         | 8,796,503,218      | 94.37%         | 46.47%                |
| C28d_3             | 28,830,332         | 8,627,977,358      | 94.45%         | 45.75%                |
| E28d_1             | 29,501,446         | 8,833,115,880      | 95.03%         | 45.72%                |
| E28d_2             | 27,861,987         | 8,341,232,474      | 95.06%         | 45.64%                |
| E28d_3             | 25,994,296         | 7,781,761,052      | 94.90%         | 46.01%                |
| C28+2d_1           | 27,383,585         | 8,190,062,168      | 94.98%         | 46.43%                |
| C28+2d_2           | 24,662,429         | 7,378,658,646      | 95.28%         | 46.33%                |
| C28+2d_3           | 26,167,778         | 7,830,757,930      | 94.96%         | 46.02%                |
| E28+2d_1           | 27,940,093         | 8,362,073,730      | 95.00%         | 45.74%                |
| E28+2d_2           | 25,969,747         | 7,772,674,114      | 95.30%         | 45.97%                |
| E28+2d_3           | 26,832,556         | 8,026,229,600      | 95.26%         | 46.12%                |

**Table S3.** Mapping statistics for 27 RNA-Seq samples. Abbreviations used are as follow: E, ethylene; C, control.

| <b>Sample name</b> | <b>Total reads</b> | <b>Mapped reads</b> | <b>Uniq Mapped Reads</b> | <b>Multiple Map Reads</b> | <b>Reads Map to '+'</b> | <b>Reads Map to '-'</b> |
|--------------------|--------------------|---------------------|--------------------------|---------------------------|-------------------------|-------------------------|
| 0d_1               | 64,628,454         | 59,428,483 (91.95%) | 57,605,177 (89.13%)      | 1,823,306 (2.82%)         | 29,644,941 (45.87%)     | 29,710,728 (45.97%)     |
| 0d_2               | 48,331,040         | 44,192,964 (91.44%) | 42,863,254 (88.69%)      | 1,329,710 (2.75%)         | 22,043,238 (45.61%)     | 22,102,296 (45.73%)     |
| 0d_3               | 55,477,986         | 51,484,678 (92.80%) | 50,136,936 (90.37%)      | 1,347,742 (2.43%)         | 25,670,760 (46.27%)     | 25,745,389 (46.41%)     |
| C7d_1              | 46,305,380         | 42,375,257 (91.51%) | 41,037,722 (88.62%)      | 1,337,535 (2.89%)         | 21,144,618 (45.66%)     | 21,167,947 (45.71%)     |
| C7d_2              | 51,891,572         | 47,197,078 (90.95%) | 45,796,682 (88.25%)      | 1,400,396 (2.70%)         | 23,542,640 (45.37%)     | 23,577,278 (45.44%)     |
| C7d_3              | 48,015,982         | 43,672,720 (90.95%) | 42,115,483 (87.71%)      | 1,557,237 (3.24%)         | 21,794,809 (45.39%)     | 21,817,156 (45.44%)     |
| E7d_1              | 46,580,276         | 43,876,612 (94.20%) | 42,447,251 (91.13%)      | 1,429,361 (3.07%)         | 21,881,354 (46.98%)     | 21,923,300 (47.07%)     |
| E7d_2              | 47,437,718         | 42,471,249 (89.53%) | 41,242,906 (86.94%)      | 1,228,343 (2.59%)         | 21,189,698 (44.67%)     | 21,214,370 (44.72%)     |
| E7d_3              | 41,206,214         | 37,245,607 (90.39%) | 35,907,098 (87.14%)      | 1,338,509 (3.25%)         | 18,564,826 (45.05%)     | 18,599,710 (45.14%)     |
| C14d_1             | 46,871,026         | 43,128,078 (92.01%) | 41,038,330 (87.56%)      | 2,089,748 (4.46%)         | 21,540,209 (45.96%)     | 21,532,586 (45.94%)     |
| C14d_2             | 50,358,000         | 46,304,562 (91.95%) | 43,939,692 (87.25%)      | 2,364,870 (4.70%)         | 23,138,832 (45.95%)     | 23,118,178 (45.91%)     |
| C14d_3             | 59,694,422         | 55,877,653 (93.61%) | 52,386,622 (87.76%)      | 3,491,031 (5.85%)         | 27,908,143 (46.75%)     | 27,889,882 (46.72%)     |
| E14d_1             | 60,094,832         | 56,271,989 (93.64%) | 53,686,668 (89.34%)      | 2,585,321 (4.30%)         | 28,027,082 (46.64%)     | 28,080,290 (46.73%)     |
| E14d_2             | 57,080,266         | 53,619,522 (93.94%) | 51,188,246 (89.68%)      | 2,431,276 (4.26%)         | 26,732,928 (46.83%)     | 26,765,097 (46.89%)     |
| E14d_3             | 54,438,218         | 50,772,527 (93.27%) | 48,107,950 (88.37%)      | 2,664,577 (4.89%)         | 25,314,285 (46.50%)     | 25,338,363 (46.55%)     |
| C28d_1             | 55,001,782         | 50,922,010 (92.58%) | 49,037,323 (89.16%)      | 1,884,687 (3.43%)         | 25,417,178 (46.21%)     | 25,444,459 (46.26%)     |
| C28d_2             | 58,777,320         | 53,353,330 (90.77%) | 51,542,498 (87.69%)      | 1,810,832 (3.08%)         | 26,645,930 (45.33%)     | 26,641,422 (45.33%)     |
| C28d_3             | 57,660,664         | 52,890,663 (91.73%) | 50,971,149 (88.40%)      | 1,919,514 (3.33%)         | 26,410,153 (45.80%)     | 26,406,432 (45.80%)     |
| E28d_1             | 59,002,892         | 55,976,943 (94.87%) | 53,969,107 (91.47%)      | 2,007,836 (3.40%)         | 27,926,237 (47.33%)     | 27,967,544 (47.40%)     |
| E28d_2             | 55,723,974         | 52,526,065 (94.26%) | 50,727,059 (91.03%)      | 1,799,006 (3.23%)         | 26,199,414 (47.02%)     | 26,245,457 (47.10%)     |
| E28d_3             | 51,988,592         | 48,066,228 (92.46%) | 46,293,987 (89.05%)      | 1,772,241 (3.41%)         | 23,967,944 (46.10%)     | 24,007,692 (46.18%)     |
| C28+2d_1           | 54,767,170         | 51,286,359 (93.64%) | 49,928,584 (91.17%)      | 1,357,775 (2.48%)         | 25,600,421 (46.74%)     | 25,633,528 (46.80%)     |
| C28+2d_2           | 49,324,858         | 44,605,633 (90.43%) | 43,536,696 (88.27%)      | 1,068,937 (2.17%)         | 22,254,993 (45.12%)     | 22,281,680 (45.17%)     |
| C28+2d_3           | 52,335,556         | 48,148,874 (92.00%) | 47,128,873 (90.05%)      | 1,020,001 (1.95%)         | 24,043,526 (45.94%)     | 24,059,110 (45.97%)     |
| E28+2d_1           | 55,880,186         | 52,276,719 (93.55%) | 51,204,802 (91.63%)      | 1,071,917 (1.92%)         | 26,082,138 (46.68%)     | 26,101,674 (46.71%)     |
| E28+2d_2           | 51,939,494         | 47,910,646 (92.24%) | 46,536,356 (89.60%)      | 1,374,290 (2.65%)         | 23,844,012 (45.91%)     | 23,899,069 (46.01%)     |
| E28+2d_3           | 53,665,112         | 49,847,373 (92.89%) | 48,686,432 (90.72%)      | 1,160,941 (2.16%)         | 24,870,661 (46.34%)     | 24,901,330 (46.40%)     |

**Table S4.** Correlation matrix between 27 RNA-Seq samples. Abbreviations used are as follow: E, ethylene; C, control.

| #Sample  | 0d_1   | 0d_2   | 0d_3   | C7d_1  | C7d_2  | C7d_3  | E7d_1  | E7d_2  | E7d_3  | C14d_1 | C14d_2 | C14d_3 | E14d_1 | E14d_2 | E14d_3 |
|----------|--------|--------|--------|--------|--------|--------|--------|--------|--------|--------|--------|--------|--------|--------|--------|
| 0d_1     | 1      | 0.9312 | 0.9124 | 0.4507 | 0.4555 | 0.4114 | 0.3325 | 0.5558 | 0.3907 | 0.6094 | 0.5825 | 0.6322 | 0.4394 | 0.5991 | 0.5861 |
| 0d_2     | 0.9312 | 1      | 0.9277 | 0.479  | 0.4847 | 0.433  | 0.349  | 0.5978 | 0.4074 | 0.6327 | 0.6065 | 0.6419 | 0.4305 | 0.5906 | 0.5886 |
| 0d_3     | 0.9124 | 0.9277 | 1      | 0.4191 | 0.4143 | 0.3788 | 0.3178 | 0.558  | 0.3855 | 0.6017 | 0.5559 | 0.6036 | 0.4263 | 0.5968 | 0.5766 |
| C7d_1    | 0.4507 | 0.479  | 0.4191 | 1      | 0.9762 | 0.9766 | 0.825  | 0.8417 | 0.7717 | 0.8795 | 0.8871 | 0.8763 | 0.585  | 0.6934 | 0.7446 |
| C7d_2    | 0.4555 | 0.4847 | 0.4143 | 0.9762 | 1      | 0.9682 | 0.7875 | 0.8191 | 0.7394 | 0.8855 | 0.9027 | 0.8739 | 0.5851 | 0.6831 | 0.7321 |
| C7d_3    | 0.4114 | 0.433  | 0.3788 | 0.9766 | 0.9682 | 1      | 0.8424 | 0.8147 | 0.7906 | 0.8539 | 0.8647 | 0.8496 | 0.5747 | 0.6801 | 0.734  |
| E7d_1    | 0.3325 | 0.349  | 0.3178 | 0.825  | 0.7875 | 0.8424 | 1      | 0.8249 | 0.8962 | 0.7169 | 0.7078 | 0.7137 | 0.6795 | 0.7141 | 0.7648 |
| E7d_2    | 0.5558 | 0.5978 | 0.558  | 0.8417 | 0.8191 | 0.8147 | 0.8249 | 1      | 0.8118 | 0.8138 | 0.7981 | 0.805  | 0.6324 | 0.7212 | 0.7613 |
| E7d_3    | 0.3907 | 0.4074 | 0.3855 | 0.7717 | 0.7394 | 0.7906 | 0.8962 | 0.8118 | 1      | 0.7229 | 0.6839 | 0.7312 | 0.6743 | 0.7057 | 0.7559 |
| C14d_1   | 0.6094 | 0.6327 | 0.6017 | 0.8795 | 0.8855 | 0.8539 | 0.7169 | 0.8138 | 0.7229 | 1      | 0.9697 | 0.9765 | 0.691  | 0.8352 | 0.8651 |
| C14d_2   | 0.5825 | 0.6065 | 0.5559 | 0.8871 | 0.9027 | 0.8647 | 0.7078 | 0.7981 | 0.6839 | 0.9697 | 1      | 0.9711 | 0.6657 | 0.7901 | 0.8352 |
| C14d_3   | 0.6322 | 0.6419 | 0.6036 | 0.8763 | 0.8739 | 0.8496 | 0.7137 | 0.805  | 0.7312 | 0.9765 | 0.9711 | 1      | 0.6941 | 0.8326 | 0.8711 |
| E14d_1   | 0.4394 | 0.4305 | 0.4263 | 0.585  | 0.5851 | 0.5747 | 0.6795 | 0.6324 | 0.6743 | 0.691  | 0.6657 | 0.6941 | 1      | 0.8917 | 0.8863 |
| E14d_2   | 0.5991 | 0.5906 | 0.5968 | 0.6934 | 0.6831 | 0.6801 | 0.7141 | 0.7212 | 0.7057 | 0.8352 | 0.7901 | 0.8326 | 0.8917 | 1      | 0.981  |
| E14d_3   | 0.5861 | 0.5886 | 0.5766 | 0.7446 | 0.7321 | 0.734  | 0.7648 | 0.7613 | 0.7559 | 0.8651 | 0.8352 | 0.8711 | 0.8863 | 0.981  | 1      |
| C28d_1   | 0.4272 | 0.4448 | 0.3993 | 0.9288 | 0.9306 | 0.9582 | 0.8361 | 0.7851 | 0.7363 | 0.8415 | 0.8577 | 0.8322 | 0.583  | 0.6972 | 0.7467 |
| C28d_2   | 0.3643 | 0.3797 | 0.3347 | 0.9526 | 0.9464 | 0.9716 | 0.849  | 0.8    | 0.7689 | 0.8446 | 0.854  | 0.8307 | 0.5863 | 0.6897 | 0.7399 |
| C28d_3   | 0.3899 | 0.4096 | 0.3536 | 0.9587 | 0.9597 | 0.9665 | 0.8499 | 0.804  | 0.762  | 0.8653 | 0.8843 | 0.8514 | 0.6102 | 0.7013 | 0.7512 |
| E28d_1   | 0.295  | 0.3018 | 0.2684 | 0.7001 | 0.6606 | 0.7151 | 0.9406 | 0.7512 | 0.8822 | 0.6229 | 0.5976 | 0.6258 | 0.7382 | 0.7205 | 0.761  |
| E28d_2   | 0.3603 | 0.3824 | 0.3243 | 0.7688 | 0.7398 | 0.7753 | 0.9163 | 0.8816 | 0.9188 | 0.7073 | 0.6852 | 0.7014 | 0.7194 | 0.7296 | 0.772  |
| E28d_3   | 0.4065 | 0.4248 | 0.3905 | 0.8298 | 0.7935 | 0.8485 | 0.9413 | 0.8264 | 0.9721 | 0.7689 | 0.7375 | 0.776  | 0.706  | 0.7463 | 0.7993 |
| C28+2d_1 | 0.4172 | 0.4426 | 0.3982 | 0.8136 | 0.8169 | 0.8188 | 0.8089 | 0.838  | 0.6919 | 0.7199 | 0.7404 | 0.7032 | 0.5655 | 0.6341 | 0.6717 |
| C28+2d_2 | 0.4061 | 0.4447 | 0.3915 | 0.6695 | 0.6942 | 0.6668 | 0.687  | 0.7947 | 0.6188 | 0.6145 | 0.6213 | 0.5852 | 0.5564 | 0.5815 | 0.5977 |
| C28+2d_3 | 0.4184 | 0.4549 | 0.4204 | 0.6569 | 0.6623 | 0.6418 | 0.6585 | 0.8116 | 0.5765 | 0.6004 | 0.6136 | 0.574  | 0.4708 | 0.5299 | 0.5491 |
| E28+2d_1 | 0.3815 | 0.4012 | 0.4066 | 0.4408 | 0.4482 | 0.4289 | 0.5165 | 0.6597 | 0.4422 | 0.4202 | 0.4159 | 0.3819 | 0.4486 | 0.4673 | 0.4505 |
| E28+2d_2 | 0.3245 | 0.3606 | 0.3376 | 0.4888 | 0.4854 | 0.4752 | 0.5937 | 0.642  | 0.5317 | 0.4532 | 0.4411 | 0.4227 | 0.6232 | 0.5621 | 0.5637 |
| E28+2d_3 | 0.4064 | 0.4553 | 0.4188 | 0.6141 | 0.6165 | 0.612  | 0.7046 | 0.8191 | 0.7172 | 0.5841 | 0.5662 | 0.5513 | 0.5821 | 0.5934 | 0.6069 |

| #Sample  | C28d_1 | C28d_2 | C28d_3 | E28d_1 | E28d_2 | E28d_3 | C28+2d_1 | C28+2d_2 | C28+2d_3 | E28+2d_1 | E28+2d_2 | E28+2d_3 |
|----------|--------|--------|--------|--------|--------|--------|----------|----------|----------|----------|----------|----------|
| 0d_1     | 0.4272 | 0.3643 | 0.3899 | 0.295  | 0.3603 | 0.4065 | 0.4172   | 0.4061   | 0.4184   | 0.3815   | 0.3245   | 0.4064   |
| 0d_2     | 0.4448 | 0.3797 | 0.4096 | 0.3018 | 0.3824 | 0.4248 | 0.4426   | 0.4447   | 0.4549   | 0.4012   | 0.3606   | 0.4553   |
| 0d_3     | 0.3993 | 0.3347 | 0.3536 | 0.2684 | 0.3243 | 0.3905 | 0.3982   | 0.3915   | 0.4204   | 0.4066   | 0.3376   | 0.4188   |
| C7d_1    | 0.9288 | 0.9526 | 0.9587 | 0.7001 | 0.7688 | 0.8298 | 0.8136   | 0.6695   | 0.6569   | 0.4408   | 0.4888   | 0.6141   |
| C7d_2    | 0.9306 | 0.9464 | 0.9597 | 0.6606 | 0.7398 | 0.7935 | 0.8169   | 0.6942   | 0.6623   | 0.4482   | 0.4854   | 0.6165   |
| C7d_3    | 0.9582 | 0.9716 | 0.9665 | 0.7151 | 0.7753 | 0.8485 | 0.8188   | 0.6668   | 0.6418   | 0.4289   | 0.4752   | 0.612    |
| E7d_1    | 0.8361 | 0.849  | 0.8499 | 0.9406 | 0.9163 | 0.9413 | 0.8089   | 0.687    | 0.6585   | 0.5165   | 0.5937   | 0.7046   |
| E7d_2    | 0.7851 | 0.8    | 0.804  | 0.7512 | 0.8816 | 0.8264 | 0.838    | 0.7947   | 0.8116   | 0.6597   | 0.642    | 0.8191   |
| E7d_3    | 0.7363 | 0.7689 | 0.762  | 0.8822 | 0.9188 | 0.9721 | 0.6919   | 0.6188   | 0.5765   | 0.4422   | 0.5317   | 0.7172   |
| C14d_1   | 0.8415 | 0.8446 | 0.8653 | 0.6229 | 0.7073 | 0.7689 | 0.7199   | 0.6145   | 0.6004   | 0.4202   | 0.4532   | 0.5841   |
| C14d_2   | 0.8577 | 0.854  | 0.8843 | 0.5976 | 0.6852 | 0.7375 | 0.7404   | 0.6213   | 0.6136   | 0.4159   | 0.4411   | 0.5662   |
| C14d_3   | 0.8322 | 0.8307 | 0.8514 | 0.6258 | 0.7014 | 0.776  | 0.7032   | 0.5852   | 0.574    | 0.3819   | 0.4227   | 0.5513   |
| E14d_1   | 0.583  | 0.5863 | 0.6102 | 0.7382 | 0.7194 | 0.706  | 0.5655   | 0.5564   | 0.4708   | 0.4486   | 0.6232   | 0.5821   |
| E14d_2   | 0.6972 | 0.6897 | 0.7013 | 0.7205 | 0.7296 | 0.7463 | 0.6341   | 0.5815   | 0.5299   | 0.4673   | 0.5621   | 0.5934   |
| E14d_3   | 0.7467 | 0.7399 | 0.7512 | 0.761  | 0.772  | 0.7993 | 0.6717   | 0.5977   | 0.5491   | 0.4505   | 0.5637   | 0.6069   |
| C28d_1   | 1      | 0.9666 | 0.9604 | 0.7176 | 0.7436 | 0.8217 | 0.8248   | 0.6536   | 0.6285   | 0.4421   | 0.501    | 0.5942   |
| C28d_2   | 0.9666 | 1      | 0.9743 | 0.7301 | 0.7742 | 0.842  | 0.8446   | 0.6721   | 0.652    | 0.4513   | 0.5061   | 0.6097   |
| C28d_3   | 0.9604 | 0.9743 | 1      | 0.7374 | 0.7798 | 0.841  | 0.8393   | 0.68     | 0.6631   | 0.457    | 0.5074   | 0.616    |
| E28d_1   | 0.7176 | 0.7301 | 0.7374 | 1      | 0.9175 | 0.9186 | 0.7213   | 0.624    | 0.5774   | 0.4744   | 0.5896   | 0.6832   |
| E28d_2   | 0.7436 | 0.7742 | 0.7798 | 0.9175 | 1      | 0.9177 | 0.7981   | 0.7496   | 0.7134   | 0.5983   | 0.6579   | 0.8177   |
| E28d_3   | 0.8217 | 0.842  | 0.841  | 0.9186 | 0.9177 | 1      | 0.7571   | 0.6417   | 0.6036   | 0.4528   | 0.5535   | 0.6983   |
| C28+2d_1 | 0.8248 | 0.8446 | 0.8393 | 0.7213 | 0.7981 | 0.7571 | 1        | 0.8812   | 0.892    | 0.7375   | 0.7024   | 0.8173   |
| C28+2d_2 | 0.6536 | 0.6721 | 0.68   | 0.624  | 0.7496 | 0.6417 | 0.8812   | 1        | 0.9317   | 0.8748   | 0.8323   | 0.9129   |
| C28+2d_3 | 0.6285 | 0.652  | 0.6631 | 0.5774 | 0.7134 | 0.6036 | 0.892    | 0.9317   | 1        | 0.8705   | 0.7496   | 0.8924   |
| E28+2d_1 | 0.4421 | 0.4513 | 0.457  | 0.4744 | 0.5983 | 0.4528 | 0.7375   | 0.8748   | 0.8705   | 1        | 0.857    | 0.8521   |
| E28+2d_2 | 0.501  | 0.5061 | 0.5074 | 0.5896 | 0.6579 | 0.5535 | 0.7024   | 0.8323   | 0.7496   | 0.857    | 1        | 0.8272   |
| E28+2d_3 | 0.5942 | 0.6097 | 0.616  | 0.6832 | 0.8177 | 0.6983 | 0.8173   | 0.9129   | 0.8924   | 0.8521   | 0.8272   | 1        |

**Table S5.** List of names and IDs of genes involved in ethylene biosynthesis and signaling, cell wall modification, and browning. The abbreviations used are listed in the legend to Fig. 3.

| Gene name | Gene ID        | Gene name | Gene ID        |
|-----------|----------------|-----------|----------------|
| SAMS1     | Prupe.1G107000 | PLY3      | Prupe.2G206100 |
| SAMS2     | Prupe.7G128500 | PME       | Prupe.7G192800 |
| ACS1      | Prupe.2G176900 | Egase     | Prupe.5G131300 |
| ACS2      | Prupe.5G083500 | XyL       | Prupe.1G309900 |
| ACO1      | Prupe.3G209900 | Exp1      | Prupe.2G263600 |
| ACO2      | Prupe.4G013800 | Exp2      | Prupe.1G276700 |
| ETR1      | Prupe.1G556000 | Exp3      | Prupe.6G075100 |
| ETR2      | Prupe.1G034300 | Exp4      | Prupe.8G174500 |
| ERS1      | Prupe.8G265200 | Gal       | Prupe.4G278500 |
| EIN2      | Prupe.6G235600 | GS        | Prupe.1G289600 |
| EIN3      | Prupe.2G058400 | XTH1      | Prupe.8G214900 |
| EIN4      | Prupe.6G348000 | XTH2      | Prupe.1G166300 |
| CTR1      | Prupe.7G117700 | PPO1      | Prupe.4G042100 |
| EIL3      | Prupe.6G018200 | PPO2      | Prupe.4G042000 |
| PG3       | Prupe.2G301000 | POD1      | Prupe.8G038900 |
| PG4       | Prupe.7G195000 | POD2      | Prupe.4G021100 |
| PLY1      | Prupe.5G161300 | LOX1      | Prupe.4G047800 |
| PLY2      | Prupe.1G060900 | LOX2      | Prupe.6G324100 |

**Table S6.** The results of multiple comparison of lipid gene expression after one-way ANOVA at 5% significance level. Red arrows indicate significantly higher level in ethylene compared with control, and green arrows mean significantly lower level. Significantly higher level in one treatment were defined as at least two time points with significantly higher level while without any time point showing significantly lower level, and allowing presence of time points with no significant difference. The total abundance of transcripts was employed for genes with multiple differential expressed members. The abbreviations used are listed in the legend to Fig. 8.

| Gene          | 7d | 14d | 28d | 28+2d | General |
|---------------|----|-----|-----|-------|---------|
| $\Delta$ 8SLD | —  | —   | —   | ↑     | —       |
| AAPT          | ↓  | ↓   | ↓   | —     | ↓       |
| ACC1          | —  | —   | —   | ↓     | —       |
| ACC2          | —  | —   | —   | —     | —       |
| ACC3          | —  | —   | —   | —     | —       |
| ACC4          | ↓  | ↓   | ↓   | —     | ↓       |
| ACC total     | —  | ↓   | —   | —     | —       |
| CDase1        | ↑  | —   | ↑   | —     | ↑       |
| CDase2        | —  | —   | —   | —     | —       |
| CDase3        | —  | ↑   | —   | —     | —       |
| CDase total   | ↑  | —   | ↑   | —     | ↑       |
| CDS           | —  | ↑   | —   | —     | —       |
| CK            | —  | —   | —   | —     | —       |
| CLS           | —  | ↓   | —   | ↓     | —       |
| CPT           | —  | —   | —   | —     | —       |
| DGAT1         | —  | —   | —   | ↑     | —       |
| DGAT2         | —  | —   | —   | —     | —       |
| DGAT3         | —  | —   | —   | —     | —       |
| DGAT total    | —  | —   | —   | ↑     | —       |
| DGD1          | ↓  | —   | ↓   | —     | ↓       |
| DGD2          | —  | —   | —   | —     | —       |
| DGD total     | ↓  | —   | ↓   | —     | ↓       |
| DGK           | —  | ↑   | —   | —     | —       |
| EK            | —  | —   | ↓   | —     | —       |
| ENR           | —  | —   | —   | ↑     | —       |
| FAH           | ↑  | —   | —   | ↑     | ↑       |
| FatB          | —  | ↑   | —   | —     | —       |



| Gene        | 7d | 14d | 28d | 28+2d | General |
|-------------|----|-----|-----|-------|---------|
| GCase1      | —  | —   | —   | —     | —       |
| GCase2      | —  | —   | —   | —     | —       |
| GCase total | —  | —   | —   | —     | —       |
| GCS         | —  | —   | ↑   | —     | —       |
| GONST1      | —  | ↑   | —   | ↑     | ↑       |
| GONST2      | —  | ↑   | —   | —     | —       |
| GONST3      | —  | —   | —   | —     | —       |
| GONST total | —  | ↑   | —   | ↑     | ↑       |
| GPAT        | —  | ↑   | —   | —     | —       |
| HAD1        | ↓  | ↑   | ↓   | —     | —       |
| HAD2        | —  | ↑   | —   | ↑     | ↑       |
| HAD total   | —  | ↑   | —   | ↑     | ↑       |
| IPCS1       | —  | —   | —   | —     | —       |
| IPCS2       | —  | —   | —   | —     | —       |
| IPCS total  | —  | —   | —   | —     | —       |
| IPUT        | —  | —   | —   | —     | —       |
| KAR1        | —  | ↑   | —   | —     | —       |
| KAR2        | —  | ↑   | —   | —     | —       |
| KAR3        | —  | —   | —   | —     | —       |
| KAR total   | —  | ↑   | —   | —     | —       |
| KAS III     | —  | —   | —   | —     | —       |
| KSR1        | ↓  | ↑   | ↓   | ↑     | —       |
| KSR2        | —  | ↑   | —   | —     | —       |
| KSR total   | ↓  | ↑   | —   | ↑     | —       |
| IACS1       | —  | ↑   | —   | —     | —       |
| LACS2       | ↓  | ↓   | ↓   | —     | ↓       |
| LACS total  | ↓  | ↓   | ↓   | —     | ↓       |
| LCB1        | —  | —   | —   | ↑     | —       |
| LCB2        | —  | ↑   | —   | ↑     | ↑       |
| LCB3        | —  | —   | —   | —     | —       |
| LCB total   | —  | —   | —   | ↑     | —       |
| LOH         | —  | —   | —   | ↑     | —       |

| Gene        | 7d | 14d | 28d | 28+2d | General |
|-------------|----|-----|-----|-------|---------|
| LPAT1       | —  | ↑   | —   | —     | —       |
| LPAT2       | —  | —   | ↓   | —     | —       |
| LPAT total  | —  | —   | ↓   | —     | —       |
| LPCAT1      | ↑  | —   | ↑   | —     | ↑       |
| LPCAT2      | —  | —   | ↑   | ↑     | ↑       |
| LPCAT total | ↑  | —   | ↑   | —     | ↑       |
| LPP1        | —  | ↑   | —   | ↑     | ↑       |
| LPP2        | —  | —   | —   | ↑     | —       |
| LPP total   | —  | ↑   | —   | ↑     | ↑       |
| MCMT        | —  | —   | —   | —     | —       |
| MGD1        | —  | —   | ↓   | —     | —       |
| MGD2        | —  | —   | —   | —     | —       |
| MGD total   | —  | —   | —   | —     | —       |
| PAP1        | —  | —   | —   | —     | —       |
| PAP2        | ↓  | —   | ↓   | —     | ↓       |
| PAP3        | —  | —   | —   | —     | —       |
| PAP4        | —  | ↑   | —   | ↑     | ↑       |
| PAP total   | —  | —   | —   | —     | —       |
| PDAT1       | —  | —   | —   | —     | —       |
| PDAT2       | ↑  | ↑   | ↑   | —     | ↑       |
| PDAT total  | ↑  | ↑   | —   | —     | ↑       |
| PEMT        | —  | —   | —   | ↑     | —       |
| PGPP1       | ↓  | —   | —   | —     | —       |
| PGPP2       | ↓  | ↓   | ↓   | —     | ↓       |
| PGPP total  | ↓  | ↓   | ↓   | —     | ↓       |
| PGPS        | —  | —   | —   | —     | —       |
| PI3K        | —  | ↑   | ↑   | —     | ↑       |
| PI3PK5      | ↓  | ↓   | —   | ↓     | ↓       |
| PI4K1       | —  | —   | —   | —     | —       |
| PI4K2       | —  | —   | —   | —     | —       |
| PI4K3       | —  | ↑   | —   | —     | —       |
| PI4K total  | —  | —   | —   | —     | —       |

| Gene      | 7d | 14d | 28d | 28+2d | General |
|-----------|----|-----|-----|-------|---------|
| PLA1      | —  | ↓   | —   | ↓     | ↓       |
| PLA2      | —  | ↓   | —   | —     | —       |
| PLA3      | —  | —   | —   | —     | —       |
| PLA4      | —  | ↑   | —   | ↑     | ↑       |
| PLA5      | ↑  | —   | ↑   | —     | ↑       |
| PLA total | —  | ↓   | —   | —     | —       |
| PLC1      | —  | ↓   | —   | —     | —       |
| PLC2      | ↓  | ↑   | ↓   | —     | —       |
| PLC total | —  | ↓   | —   | —     | —       |
| PLD1      | —  | —   | —   | —     | —       |
| PLD2      | —  | —   | —   | —     | —       |
| PLD3      | —  | —   | —   | —     | —       |
| PLD total | —  | —   | —   | —     | —       |
| PSD1      | —  | ↑   | —   | —     | —       |
| PSD2      | —  | —   | —   | —     | —       |
| PSD total | —  | —   | —   | —     | —       |
| PSS       | ↓  | —   | ↓   | —     | ↓       |
| SAD1      | —  | —   | —   | —     | —       |
| SAD2      | —  | —   | —   | —     | —       |
| SAD total | —  | —   | —   | —     | —       |
| SAT       | —  | ↑   | —   | —     | —       |
| SBH       | —  | —   | —   | ↑     | —       |
| SK        | —  | —   | —   | —     | —       |
| SPL       | ↓  | —   | ↓   | —     | ↓       |
| SPP       | —  | —   | ↓   | —     | —       |
| SQD       | —  | —   | —   | —     | —       |

**Table S7.** Expression profiles (FPKM) of differentially expressed *ERFs*. Abbreviations used are as follow: E, ethylene, C, control.

| Module    | Gene Name | GeneID         | 0d      | C7d      | E7d      | C14d    | E14d    | C28d     | E28d     | C28+2d  | E28+2d  |
|-----------|-----------|----------------|---------|----------|----------|---------|---------|----------|----------|---------|---------|
| turquoise | ESE3      | Prupe.1G390800 | 0.8128  | 0.0061   | 1.6590   | 0.0000  | 0.1385  | 0.1552   | 1.1886   | 22.6974 | 45.1718 |
|           | ERF1B     | Prupe.1G037900 | 0.0620  | 0.4090   | 1.0302   | 0.1760  | 1.0700  | 0.9801   | 2.0295   | 1.6328  | 5.5516  |
|           | CRF1      | Prupe.6G039700 | 1.8397  | 1.0676   | 4.0309   | 0.1059  | 0.1842  | 0.6959   | 6.3033   | 1.7221  | 8.2583  |
|           | ERF1B.1   | Prupe.8G224600 | 0.2130  | 0.4269   | 1.3366   | 2.0432  | 2.2222  | 1.1838   | 3.5954   | 1.5377  | 4.3718  |
|           | CRF9      | Prupe.5G220700 | 5.1227  | 1.7893   | 2.2944   | 0.3792  | 1.3738  | 1.5464   | 2.5926   | 5.0989  | 5.4680  |
|           | ERF114    | Prupe.5G141300 | 0.0563  | 0.0944   | 0.7045   | 0.0392  | 0.5115  | 0.4625   | 1.2071   | 1.6159  | 2.7457  |
|           | ERF5      | Prupe.5G062000 | 34.2848 | 54.0139  | 34.8534  | 58.8172 | 27.6126 | 45.9439  | 34.8540  | 13.4144 | 16.0334 |
| others    | ERF7      | Prupe.4G222300 | 49.7214 | 203.6252 | 109.9984 | 70.6034 | 28.5607 | 128.7197 | 82.1091  | 76.3180 | 40.8483 |
|           | ERF106    | Prupe.2G272500 | 12.9350 | 17.8615  | 8.0352   | 37.6790 | 35.1910 | 13.0418  | 9.2613   | 6.0954  | 14.2577 |
|           | ABR1      | Prupe.6G165700 | 0.4872  | 51.3363  | 37.4601  | 23.3433 | 17.1363 | 60.3310  | 41.4946  | 11.6663 | 3.6319  |
|           | RAP2.11   | Prupe.5G136200 | 0.1113  | 1.6775   | 0.5074   | 0.7371  | 1.3987  | 0.8118   | 0.6293   | 0.1997  | 0.1855  |
|           | ERF34     | Prupe.5G065300 | 0.3435  | 3.4844   | 1.5462   | 0.9151  | 0.3307  | 3.2431   | 1.1374   | 0.4909  | 0.1488  |
|           | ERF-1     | Prupe.6G064700 | 70.9426 | 32.7800  | 150.1019 | 3.1852  | 4.3251  | 40.2304  | 158.4721 | 74.8273 | 53.3249 |
|           | DREB1D    | Prupe.2G289500 | 1.0115  | 4.3762   | 15.0481  | 0.2542  | 0.4691  | 2.3667   | 17.6989  | 3.5435  | 11.3061 |
|           | ERF12     | Prupe.4G051200 | 20.2165 | 1.1254   | 3.7722   | 0.4262  | 0.6472  | 1.4691   | 3.1325   | 7.2129  | 7.5394  |
|           | DEAR2     | Prupe.6G231500 | 2.3295  | 2.0213   | 2.3486   | 1.1817  | 3.2475  | 1.7189   | 1.5986   | 2.3922  | 2.5827  |
|           | CRF4      | Prupe.2G306400 | 0.1464  | 4.0169   | 9.0632   | 0.2472  | 0.3458  | 4.4312   | 13.6924  | 2.0082  | 2.4144  |
|           | ERF27     | Prupe.2G289600 | 0.2174  | 0.2654   | 1.3218   | 0.1122  | 0.0888  | 0.3043   | 1.9182   | 0.5089  | 1.3411  |
|           | PTI6      | Prupe.2G183200 | 0.0217  | 0.8545   | 3.3690   | 0.0087  | 0.0454  | 1.5302   | 4.4650   | 0.2622  | 0.2365  |
